# Supplementary material
Source: publisher figshare collection journal article supplement (https://diabetesjournals.figshare.com/ndownloader/files/30770914)
Supplement: Supplementary file 1 [file 30770914]

**Online Supplemental Materials for:**  
**Coxsackievirus B vaccines prevent infection-accelerated diabetes in NOD mice and have**  
**no disease inducing effect**

**Authors:** Virginia M Stone, Marta Butrym, Minna M Hankaniemi, Amir-Babak Sioofy-Khojine, Vesa P Hytönen, Heikki Hyöty, Malin Flodström-Tullberg

**Contents:**

|                                                                                                        |   |
|--------------------------------------------------------------------------------------------------------|---|
| <b>Contents:</b> .....                                                                                 | 1 |
| <b>Supplementary Table 1: Reagents and suppliers</b> .....                                             | 2 |
| <b>Supplementary Figure 1: CVB1-6 vaccine has no adverse effects on weight or blood glucose.</b> ..... | 3 |
| <b>Supplementary Figure 2: CVB1-6 vaccine has no adverse effects on weight or blood glucose.</b> ..... | 4 |
| <b>Supplementary Figure 3: CVB1 vaccine protects against CVB1 accelerated diabetes. ....</b>           | 5 |
| <b>Supplementary Figure 4: CVB1 vaccine prevents CVB1-mediated exocrine tissue destruction.</b> .....  | 6 |
| <b>References</b> .....                                                                                | 6 |

**Supplementary Table 1: Reagents and suppliers**

| <b>REAGENT or RESOURCE</b>                           | <b>SOURCE</b>       | <b>REFERENCE</b> |
|------------------------------------------------------|---------------------|------------------|
| <b>Antibodies</b>                                    |                     |                  |
| Guinea pig anti-insulin 1:20,000                     | DakoCytomation      | A0564, N1542     |
| Rabbit anti-Glucagon 1:12000                         | Abcam               | EP3070, Ab92517  |
| Goat anti-guinea pig 1:200                           | Vector Laboratories | W0762, BA-7000   |
| Goat anti-rabbit 1:200                               | Dako                | E0432            |
|                                                      |                     |                  |
| <b>Biological Samples</b>                            |                     |                  |
| Formalin fixed paraffin embedded mouse pancreas      |                     |                  |
|                                                      |                     |                  |
| <b>Chemicals, Peptides, and Recombinant Proteins</b> |                     |                  |
| M199 Medium                                          | Gibco               | 11043-023        |
| Carboxymethylcellulose                               | Sigma-Aldrich       | C5013            |
| Immunohistochemistry PAP pen                         | Dako                | S2002            |
| Normal Goat Serum (used concentrations 10% and 2%)   | Dako                | X0907            |
| Elite ABC HRP Detection Kit                          | Vectastain          | PK-6100          |
| DAB Peroxidase Substrate Kit                         | Vector              | SK-4100          |
| Hematoxylin Mayer's                                  | Sigma-Aldrich       | MHS32            |

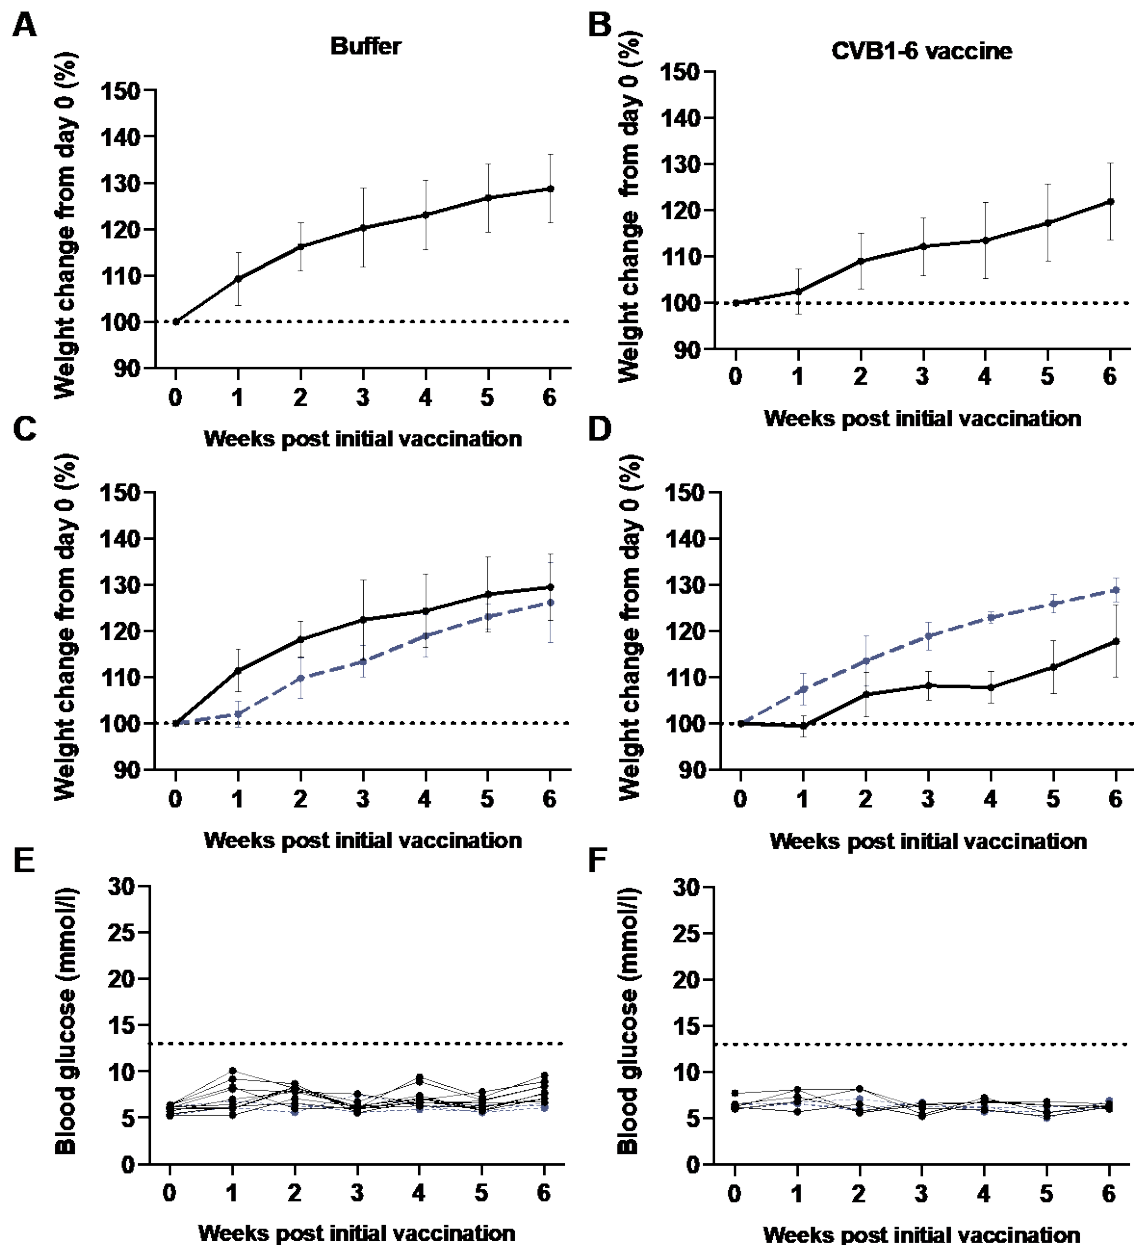

**Supplementary Figure 1: CVB1-6 vaccine has no adverse effects on weight or blood glucose.** Female NOD mice (5.1 - 6.3 weeks old) were mock vaccinated (buffer, n=13) or vaccinated with CVB1-6 vaccine (n=8) by interscapular (subcutaneous) injection on three occasions (on days 0, 14 and 28, n=3 or on days 0, 21 and 35, n=5). (a, b) Percentage weight change from day 0 in buffer treated (left) and CVB1-6 vaccinated mice (right). Shown are the mean values  $\pm$  SD. The dotted line indicates the weight prior to the first vaccination on day 0. In (b) the weight data has been separated into new data (black lines) and data previously published in (1). (c) Blood glucose values for the buffer treated (left) and CVB1-6 vaccinated (right) mice from day 0. The dotted line indicates the diabetes threshold. The blue lines were previously published in (1).

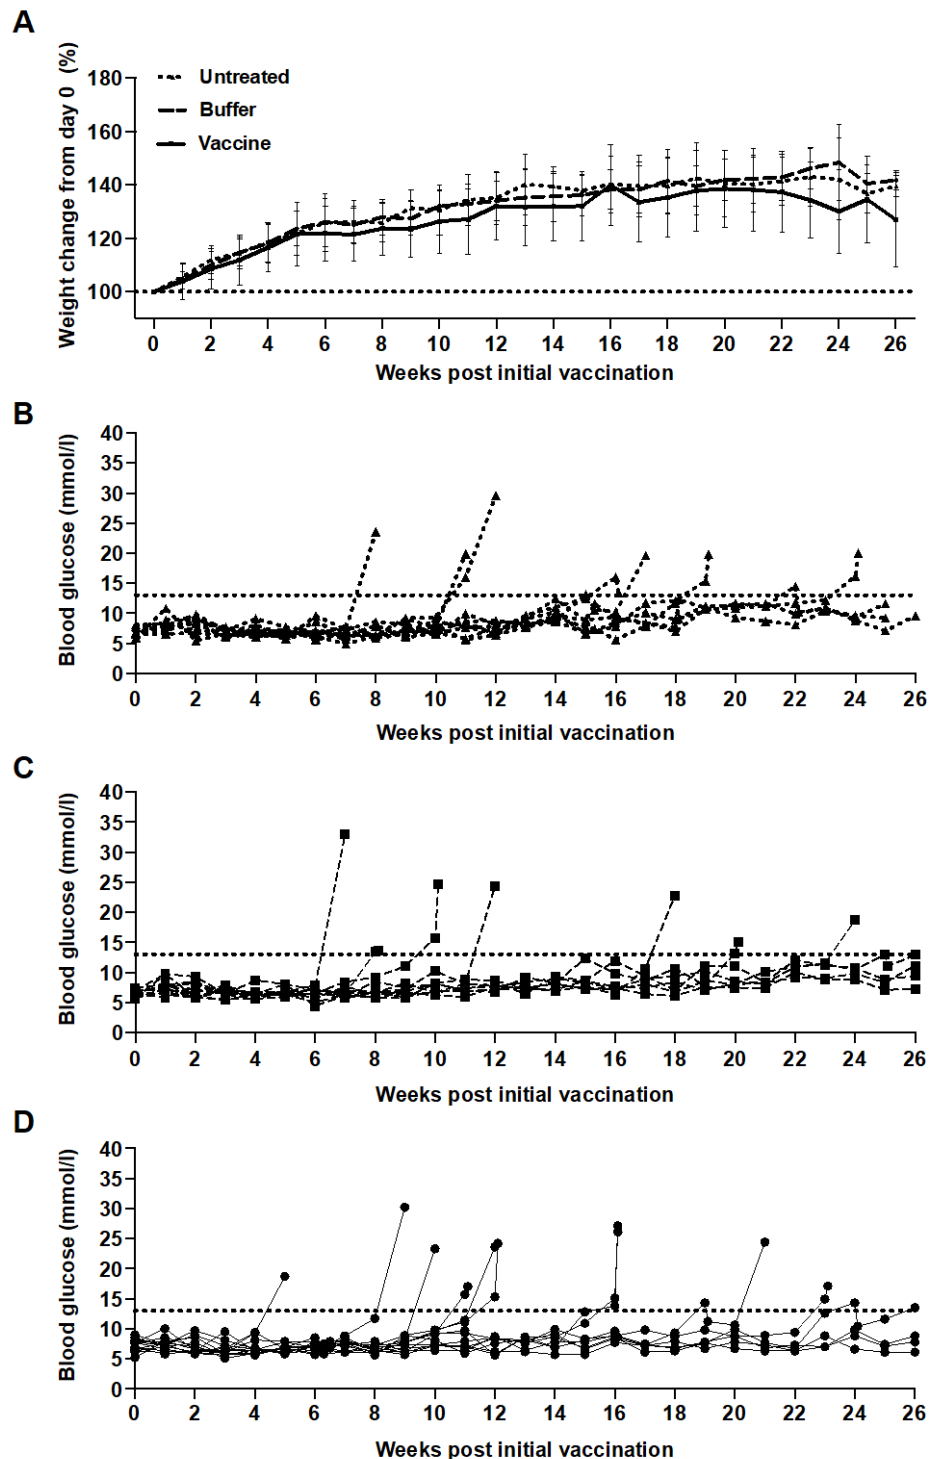

**Supplementary Figure 2: CVB1-6 vaccine has no adverse effects on weight or blood glucose.** Female NOD mice (4.9 - 7.1 weeks old) were left untreated (n=10), mock-vaccinated (n=15) or vaccinated (n=14) with CVB1-6 vaccine by interscapular (subcutaneous) injection on either two (days 0 and 21; n=6 for buffer, n=10 for CVB1-6 vaccine) or three (days 0, 21 and 35; n=9 for buffer, n=4 for CVB1-6 vaccine) occasions. (a) Percentage weight change from day 0 in untreated, mock-vaccinated (buffer) and CVB1-6 vaccinated mice. Shown are the mean values  $\pm$  SD. The dotted line indicates the weight prior to the first vaccination on day 0. (b) Blood glucose values for the untreated (b), mock-vaccinated (buffer) (c) and CVB1-6 vaccinated (d) mice from day 0 post initial vaccination. The dotted line indicates the diabetes threshold.

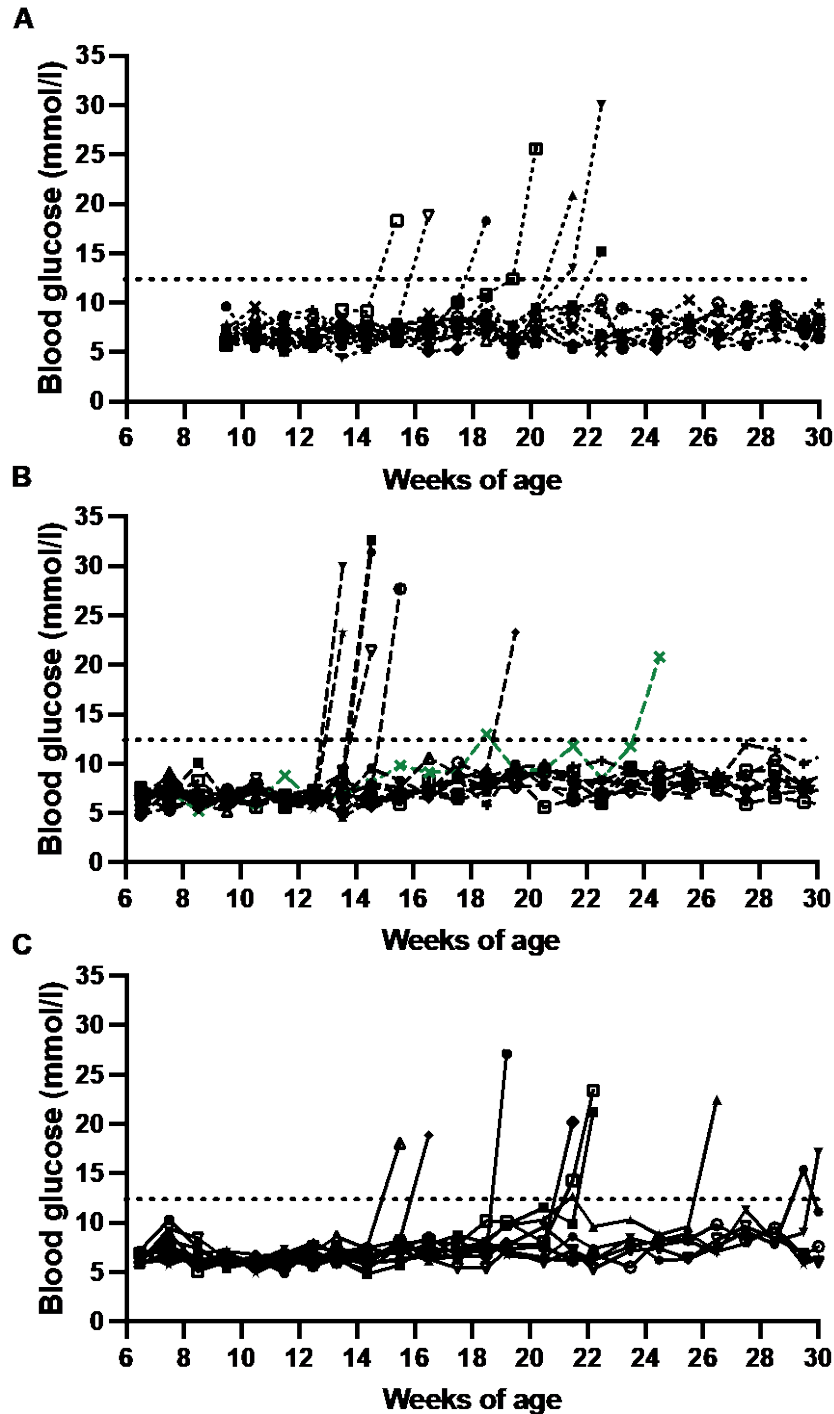

**Supplementary Figure 3: CVB1 vaccine protects against CVB1 accelerated diabetes.**

Female NOD mice were left (a) untreated (dotted lines;  $n=16$ ; blood glucose levels monitored from 8 weeks of age), (b) mock-vaccinated with vaccine buffer and infected with CVB1 virus (dashed lines; buffer + CVB1;  $n=16$ ; 6.3 – 6.9 weeks old) or (c) vaccinated with CVB1 vaccine and infected with CVB1 virus (solid lines; vaccine + CVB1;  $n=12$ ; 6.3 – 6.9 weeks old). Vaccinations (buffer or vaccine injections) were performed on days 0, 21 and 35 and the mice were infected with virus ( $10^7$  PFU by i.p. injection, total volume 200 $\mu$ l) on day 42 (12.3 -12.9 weeks of age). (a-c) Blood glucose levels were monitored up to 30 weeks of age. The dotted line indicates the diabetes threshold. In (b) the mouse in green was borderline diabetic until 25 weeks of age and excluded from some of the statistical analyses performed in Fig. 3e in the main article text.

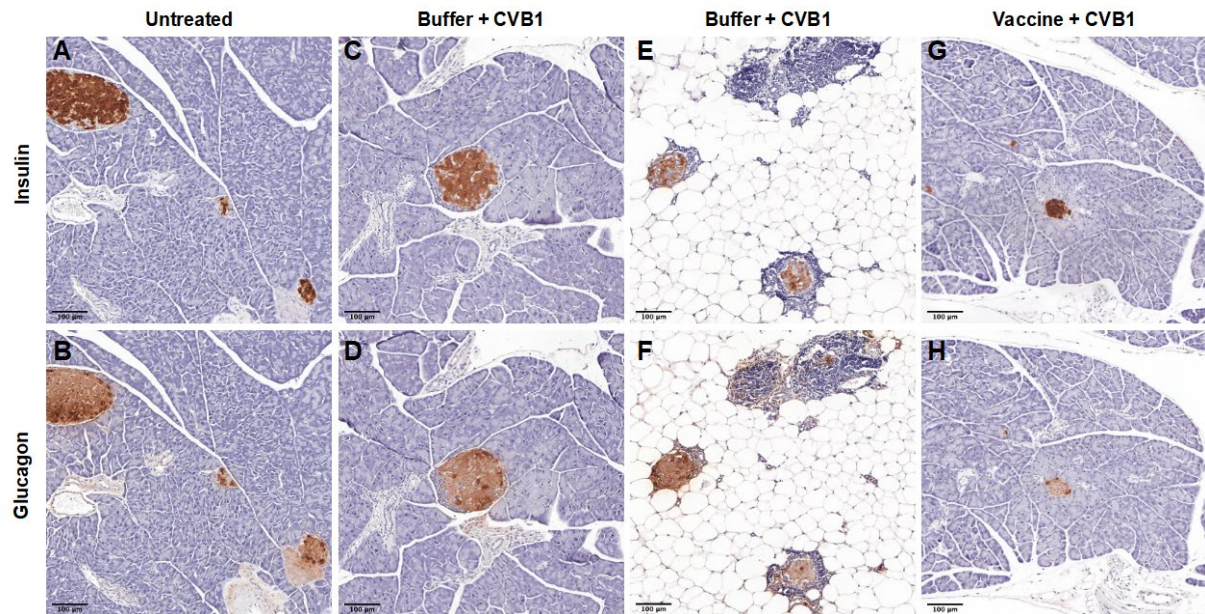

**Supplementary Figure 4: CVB1 vaccine prevents CVB1-mediated exocrine tissue destruction.** Female NOD mice were left untreated (a, b; n=15; blood glucose levels monitored from 8 weeks of age), mock-vaccinated with vaccine buffer and infected with CVB1 virus (c-f; buffer + CVB1; n=16; 6.3 – 6.9 weeks old) or vaccinated with CVB1 vaccine and infected with CVB1 virus (g, h; vaccine + CVB1; n=12; 6.3 – 6.9 weeks old). Vaccinations (buffer or vaccine injections) were performed on days 0, 21 and 35 and the mice were infected with virus ( $10^7$  PFU by i.p. injection, total volume 200 $\mu$ l) on day 42 (12.3 -12.9 weeks of age). Mice were followed until diabetes onset or 30 weeks of age and at the terminal timepoints pancreas was collected for histological analysis. (a-h) Representative images of pancreas histology from mice that did not develop diabetes by the terminal endpoint. Sequential sections were stained with insulin (a, c, e, g) or glucagon (b, d, f, h) and assessed by light microscopy. The images in c-f come from the same mouse and show a part of the exocrine tissue with healthy appearance (c, d) and another part with extensive fatty replacement of acinar cells by fat (e, f). Scale bars are shown in the bottom left-hand corner of each image (scale bar = 100 $\mu$ m).

## References

1. Stone VM, Hankaniemi MM, Laitinen OH, Sioofy-Khojine AB, Lin A, Diaz Lozano IM, Mazur MA, Marjomaki V, Lore K, Hyoty H, Hytonen VP, Flodstrom-Tullberg M: A hexavalent Coxsackievirus B vaccine is highly immunogenic and has a strong protective capacity in mice and nonhuman primates. *Sci Adv* 2020;6:eaaz2433
